# Supplementary material for: Refinement of the karyological aspects of Psidium guineense (Swartz, 1788): a comparison with Psidium guajava (Linnaeus, 1753)
Source: Comp Cytogenet. 2016 Feb 2;10(1):117–28. doi: 10.3897/CompCytogen.v10i1.6462 (PMC4856930; doi:10.3897/CompCytogen.v10i1.6462)
Supplement: Supplementary material 1 — SSR locus, annealing temperature (TA), motif, and allele number amplified in the genome of Psidium guineense and Psidium guajava. [file CompCytogen-010-117-s001.doc]

**Appendix 1.** SSR locus, annealing temperature (TA), motif, and allele number amplified in the genome of *P. guineense* and *P. guajava*.

| **SSR locus** | **TA** | **Motif** | **Allele number for each SSR primer in *P.guineense*** | **Allele number for each SSR primer in *P. guajava*** |
| --- | --- | --- | --- | --- |
| mPgCIR 1 | 55 | (GA)17 | 1 | 2 |
| mPgCIR 2 | 55 | (GA)20 | 2 | 1 |
| mPgCIR 3 | 55 | (GA)40 | 1 | 1 |
| mPgCIR 9 | 55 | (GA)19 | 2 | 1 |
| mPgCIR 10 | 55 | (CT)12 | 2 | 1 |
| mPgCIR 11 | 55 | (CT)17 | 2 | 1 |
| mPgCIR 13 | 55 | (AC)12(AT)4G(GA)2 | 2 | 2 |
| mPgCIR 14 | 55 | (GA)11 | 2 | 1 |
| mPgCIR 15 | 55 | (GA)8GG(GA)9 | 2 | 1 |
| mPgCIR 16 | 55 | (TC)25 | 1 | 2 |
| mPgCIR 17 | 55 | (CT)23 | 1 | 1 |
| mPgCIR 18 | 55 | (GA)23 | 1 | 1 |
| mPgCIR 19 | 55 | (CT)16 | 1 | 1 |
| mPgCIR 20 | 55 | (CT)14(CA)17 | 2 | 1 |
| mPgCIR 23 | 55 | (TA)4(GT)7 | 1 | 1 |
| mPgCIR 25 | 55 | (GA)24 | 1 | 1 |
| mPgCIR 26 | 55 | (GT)2(GA)17 | 4 | 2 |
| mPgCIR 29 | 50 | (GA)8 / (GAA)5 | 1 | 1 |
| mPgCIR 30 | 55 | (GA)30 | 1 | 1 |
| mPgCIR 31 | 50 | (GA)24 | 1 | 1 |
| mPgCIR 34 | 50 | (GA)16 | 1 | 1 |
| mPgCIR 39 | 50 | (GA)17 | 1 | 1 |
| mPgCIR 40 | 50 | (GTA)6 | 1 | 3 |
| mPgCIR 46 | 56 | (GA)36 | 2 | 1 |
| mPgCIR 91 | 56 | (GA)16/(GGGA)3 | 1 | 2 |
| mPgCIR 94 | 50 | (GA)18/(GT)6 | 1 | 1 |
| mPgCIR 97 | 50 | (GGAA)3/(GGTC)3 | 2 | 1 |
| mPgCIR 98 | 50 | (GA)15 | 1 | 1 |
| mPgCIR 99 | 55 | (GA)20/(GAT)14 | 2 | 1 |
| mPgCIR 100 | 50 | (GA)15/(GGAA)3 | 3 | 2 |
| mPgCIR 104 | 50 | (GGTT)3 | 3 | 1 |
| mPgCIR 105 | 50 | (GA)30/(GAAAGA)3 | 1 | 1 |
| mPgCIR 108 | 50 | (GA)13/(GGAG)3 | 1 | 1 |
| mPgCIR 111 | 50 | (GA)19 | 1 | 1 |
| mPgCIR 125 | 50 | (GT)13/(GTGA)3 | 1 | 1 |
| mPgCIR 127 | 55 | (GGTT)3/(TATA)3 | 1 | 1 |
| mPgCIR 128 | 50 | (GT)8/(ATTT)3 | 3 | 2 |
| mPgCIR 130 | 50 | (GT)8/(GA)6 | 2 | 1 |
| mPgCIR 135 | 50 | (GA)12 | 2 | 1 |
| mPgCIR 137 | 55 | (GA)18 | 1 | 1 |
| mPgCIR 139 | 54 | (GT)9/(GA)9 | 1 | 1 |
| mPgCIR 144 | 50 | (GA)17 | 1 | 1 |
| mPgCIR 148 | 50 | (GA)19/(GGGT)3 | 1 | 1 |
| mPgCIR 153 | 50 | (GA)20 | 1 | 1 |
| Supplement 1 – Continue | | | | |
| **SSR locus** | **TA** | **Motif** | **Allele number for each SSR primer in *P.guineense*** | **Allele number for each SSR primer in *P. guajava*** |
| mPgCIR 155 | 50 | (CGTA)3/(AAAGT)3 | 1 | 1 |
| mPgCIR 157 | 50 | (GA)21/(GGAA)3 | 2 | 1 |
| mPgCIR 158 | 50 | (GT)13 | 1 | 1 |
| mPgCIR 160 | 50 | (GA)10 | 2 | 1 |
| mPgCIR 161 | 55 | (GA)15/(GA)6 | 1 | 1 |
| mPgCIR 162 | 50 | (GA)9/(GCGC)3 | 1 | 1 |
| mPgCIR 167 | 50 | (CGTA)3 | 1 | 1 |
| mPgCIR 171 | 50 | (GA)31 | 1 | 1 |
| mPgCIR 173 | 56 | (GA)24 /(GA)6 | 1 | 1 |
| mPgCIR 174 | 56 | (GA)20/(GA)9/(GGTC)3 | 1 | 1 |
| mPgCIR 175 | 56 | (GA)16 | 1 | 1 |
| mPgCIR 179 | 54 | (GA)16 | 1 | 1 |
| mPgCIR 184 | 55 | (GA)23/(GAGG)3 | 1 | 1 |
| mPgCIR 186 | 55 | (GA)18/(GA)8/(GA)15 | 2 | 2 |
| mPgCIR 187 | 55 | (GGAA)3 | 1 | 1 |
| mPgCIR 188 | 55 | (GA)9 | 1 | 1 |
| mPgCIR 192 | 50 | (GA)23 | 1 | 2 |
| mPgCIR 198 | 55 | (GA)22/(GGTTGA)3 | 2 | 2 |
| mPgCIR 200 | 55 | (GA)6 | 1 | 1 |
| mPgCIR 202 | 50 | (GA)17/(GAAA)/(GA)6/(GCGA)5 | 1 | 1 |
| mPgCIR 206 | 55 | (GA)8/(GT)11 | 1 | 1 |
| mPgCIR 208 | 55 | (GA)29/(GAG)5 | 1 | 2 |
| mPgCIR 209 | 55 | (GA)15 | 1 | 2 |
| mPgCIR 211 | 55 | (GT)8 | 1 | 1 |
| mPgCIR 212 | 55 | (GA)23 | 1 | 2 |
| mPgCIR 214 | 55 | (GT)6 | 1 | 1 |
| mPgCIR 216 | 55 | (CGTA)3 | 1 | 1 |
| mPgCIR 220 | 55 | (GT)8/(GA)20 | 3 | 1 |
| mPgCIR 225 | 55 | (GT)9/(AGAA)3 | 1 | 1 |
| mPgCIR 226 | 50 | (CGTA)3 | 2 | 1 |
| mPgCIR 231 | 55 | (GT)9/(GA)12 | 1 | 2 |
| mPgCIR 233 | 50 | (GA)22 | 1 | 1 |
| mPgCIR 234 | 50 | (GT)11 | 1 | 1 |
| mPgCIR 235 | 55 | (GA)28/(GAGT)4 | 1 | 2 |
| mPgCIR 237 | 55 | (GA)16 | 1 | 1 |
| mPgCIR 238 | 55 | (GT)9/(GT)8 | 1 | 1 |
| mPgCIR 242 | 55 | (GA)12 | 3 | 2 |
| mPgCIR 243 | 55 | (GA)29 | 2 | 1 |
| mPgCIR 245 | 55 | (GA)11(GGTA)3 | 1 | 1 |
| mPgCIR 247 | 55 | (GA)20 | 1 | 1 |
| mPgCIR 253 | 55 | (GA)29 | 2 | 2 |
| mPgCIR 254 | 50 | (GT)16 | 2 | 1 |
| mPgCIR 255 | 50 | (GA)27/(GA)23 | 3 | 1 |
| mPgCIR 256 | 50 | (GA)12 | 4 | 2 |
| mPgCIR 271 | 55 | (GT)8(TGAG)3 | 1 | 1 |
| mPgCIR 272 | 50 | (ACAGG)4(GACTGG)6 | 2 | 2 |
| mPgCIR 277 | 50 | (TG)11(GT)9 | 2 | 2 |
| Supplement 1 – Continue | | | | |
| **SSR locus** | **TA** | **Motif** | **Allele number for each SSR primer in *P.guineense*** | **Allele number for each SSR primer in *P. guajava*** |
| mPgCIR 287 | 50 | (AG)35(TG)8 | 1 | 1 |
| mPgCIR 284 | 55 | (AC)10 | 2 | 1 |
| mPgCIR 285 | 50 | (GA)11(GA)18 | 1 | 1 |
| mPgCIR 288 | 50 | (CT)19 | 1 | 1 |
| mPgCIR 290 | 50 | (AG)23 | 2 | 1 |
| mPgCIR 316 | 50 | (GA)24 | 3 | 3 |
| mPgCIR 326 | 50 | (CT)16 | 1 | 1 |
| mPgCIR 334 | 55 | (AG)25 | 2 | 3 |
| mPgCIR 347 | 55 | (GA)6(GA)13 | 1 | 1 |
| mPgCIR 374 | 50 | (TC)19(CA)10 | 1 | 1 |
| mPgCIR 378 | 55 | (CT)10(CT)6 | 1 | 2 |
| mPgCIR 389 | 55 | (TG)6 (GT)11 (TC)10 | 2 | 2 |
| mPgCIR 392 | 55 | (AC)10 | 1 | 2 |
| mPgCIR 399 | 55 | (TC)7(TC)11(TC)10(CA)14(CA)8 | 1 | 1 |
| mPgCIR 405 | 50 | (GA)32 | 1 | 1 |
| mPgCIR 416 | 55 | (TG)8(AG)6(GAGG)3 | 2 | 1 |
| mPgCIR 419 | 55 | (CT)17 | 1 | 1 |
| mPgCIR 420 | 55 | (CA)15 | 3 | 1 |
| mPgCIR 422 | 55 | (GA)10 | 3 | 3 |
| mPgCIR 426 | 55 | (CT)17 | 1 | 1 |
| mPgCIR 432 | 55 | (GA)34(GTGTC)4 | 1 | 1 |
| mPgCIR 437 | 55 | (AC)10 | 1 | 1 |
| mPgCIR 439 | 55 | (CA)8(ACAC)4 | 2 | 1 |
